# Supplementary material for: Foliar spraying of indoleacetic acid (IAA) enhances the phytostabilization of Pb in naturally tolerant ryegrass by limiting the root-to-shoot transfer of Pb and improving plant growth
Source: PeerJ journal article supplement (doi:10.7717/peerj.16560), 2023-12-15

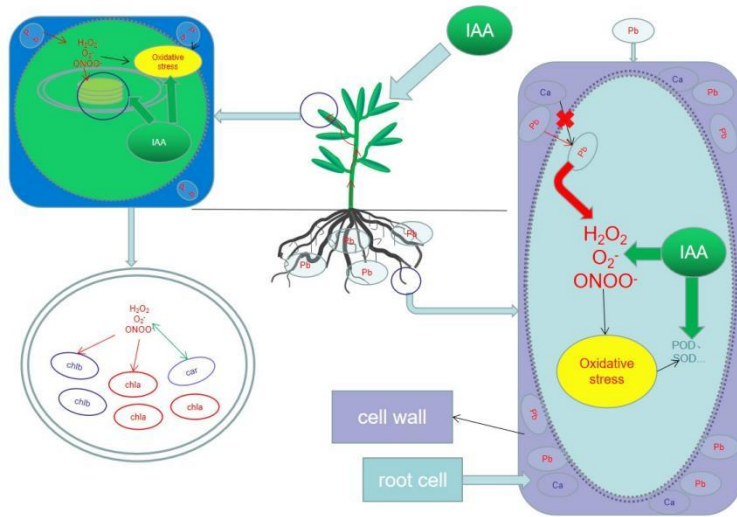

Supplement: Graphic.pdf [file Graphic.pdf]
