# Supplementary material for: Foliar spraying of indoleacetic acid (IAA) enhances the phytostabilization of Pb in naturally tolerant ryegrass by limiting the root-to-shoot transfer of Pb and improving plant growth
Source: PeerJ journal article supplement (doi:10.7717/peerj.16560), 2023-12-15
Supplement: Supplemental_Files_1.pdf [file Supplemental_Files_1.pdf]

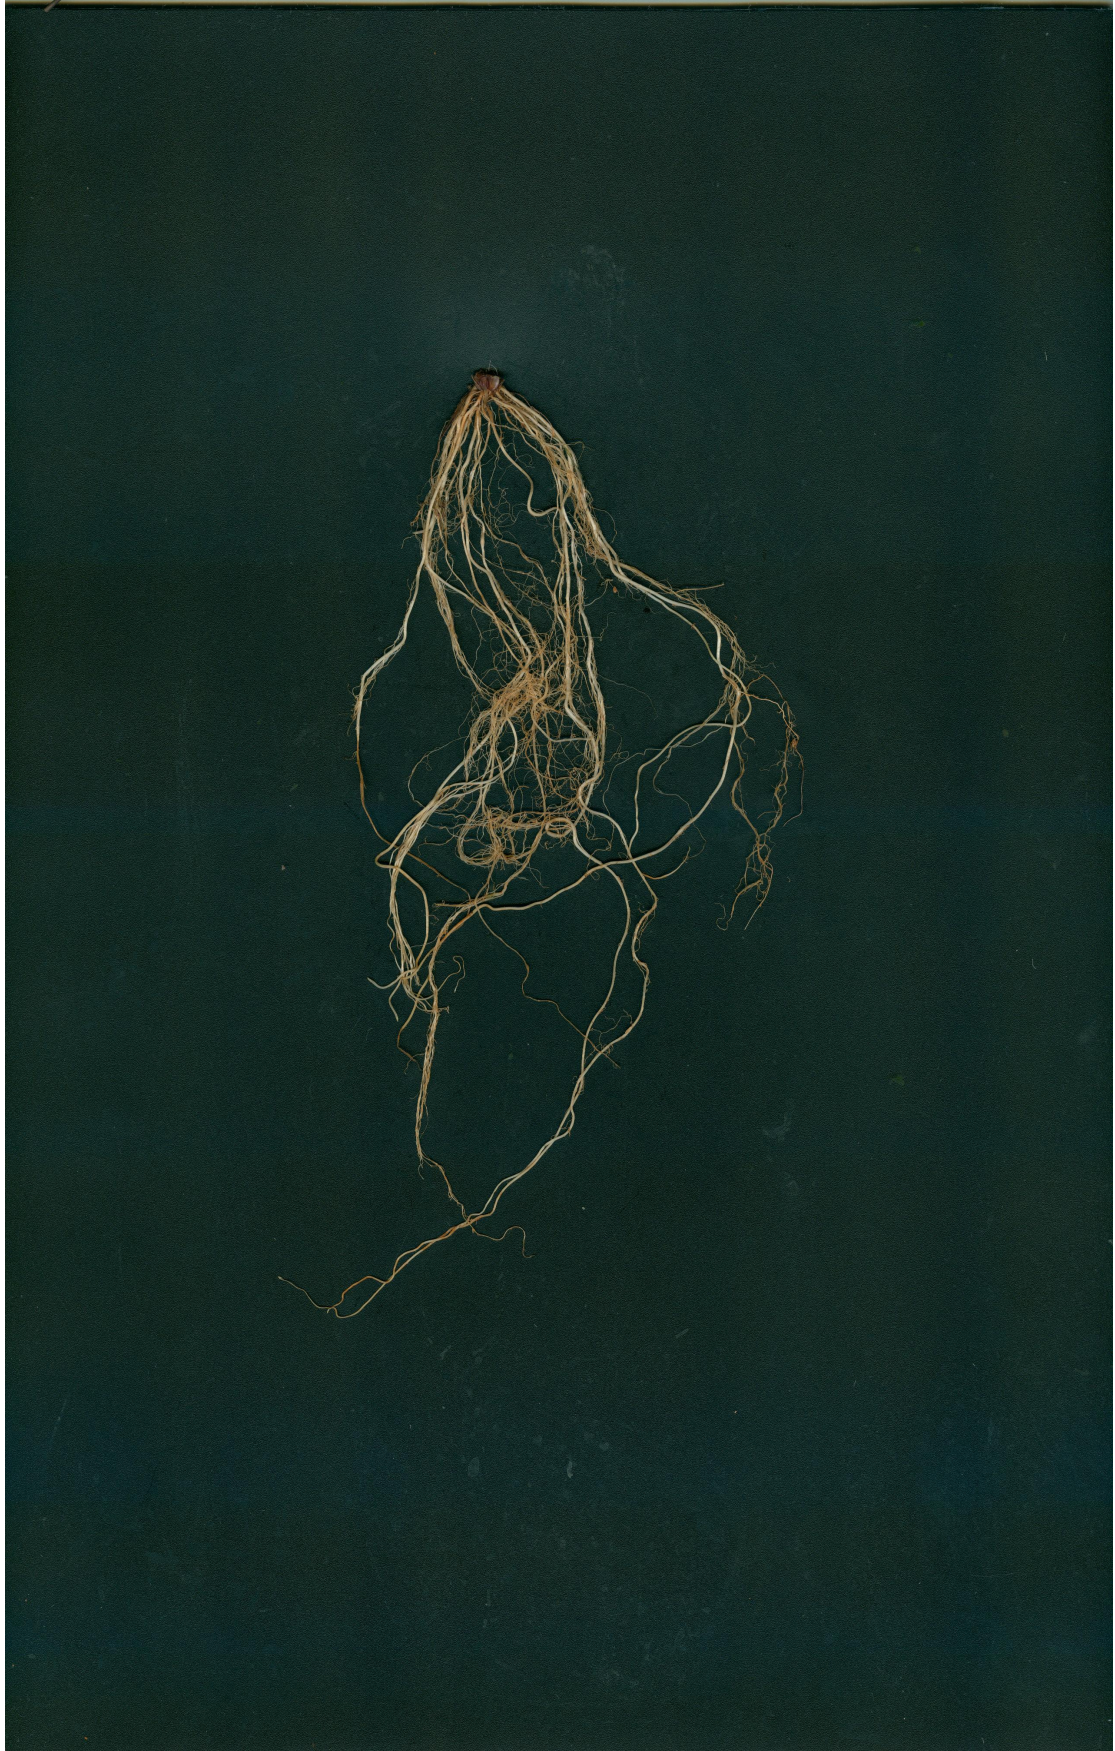

IAA+250mg/kg Pb



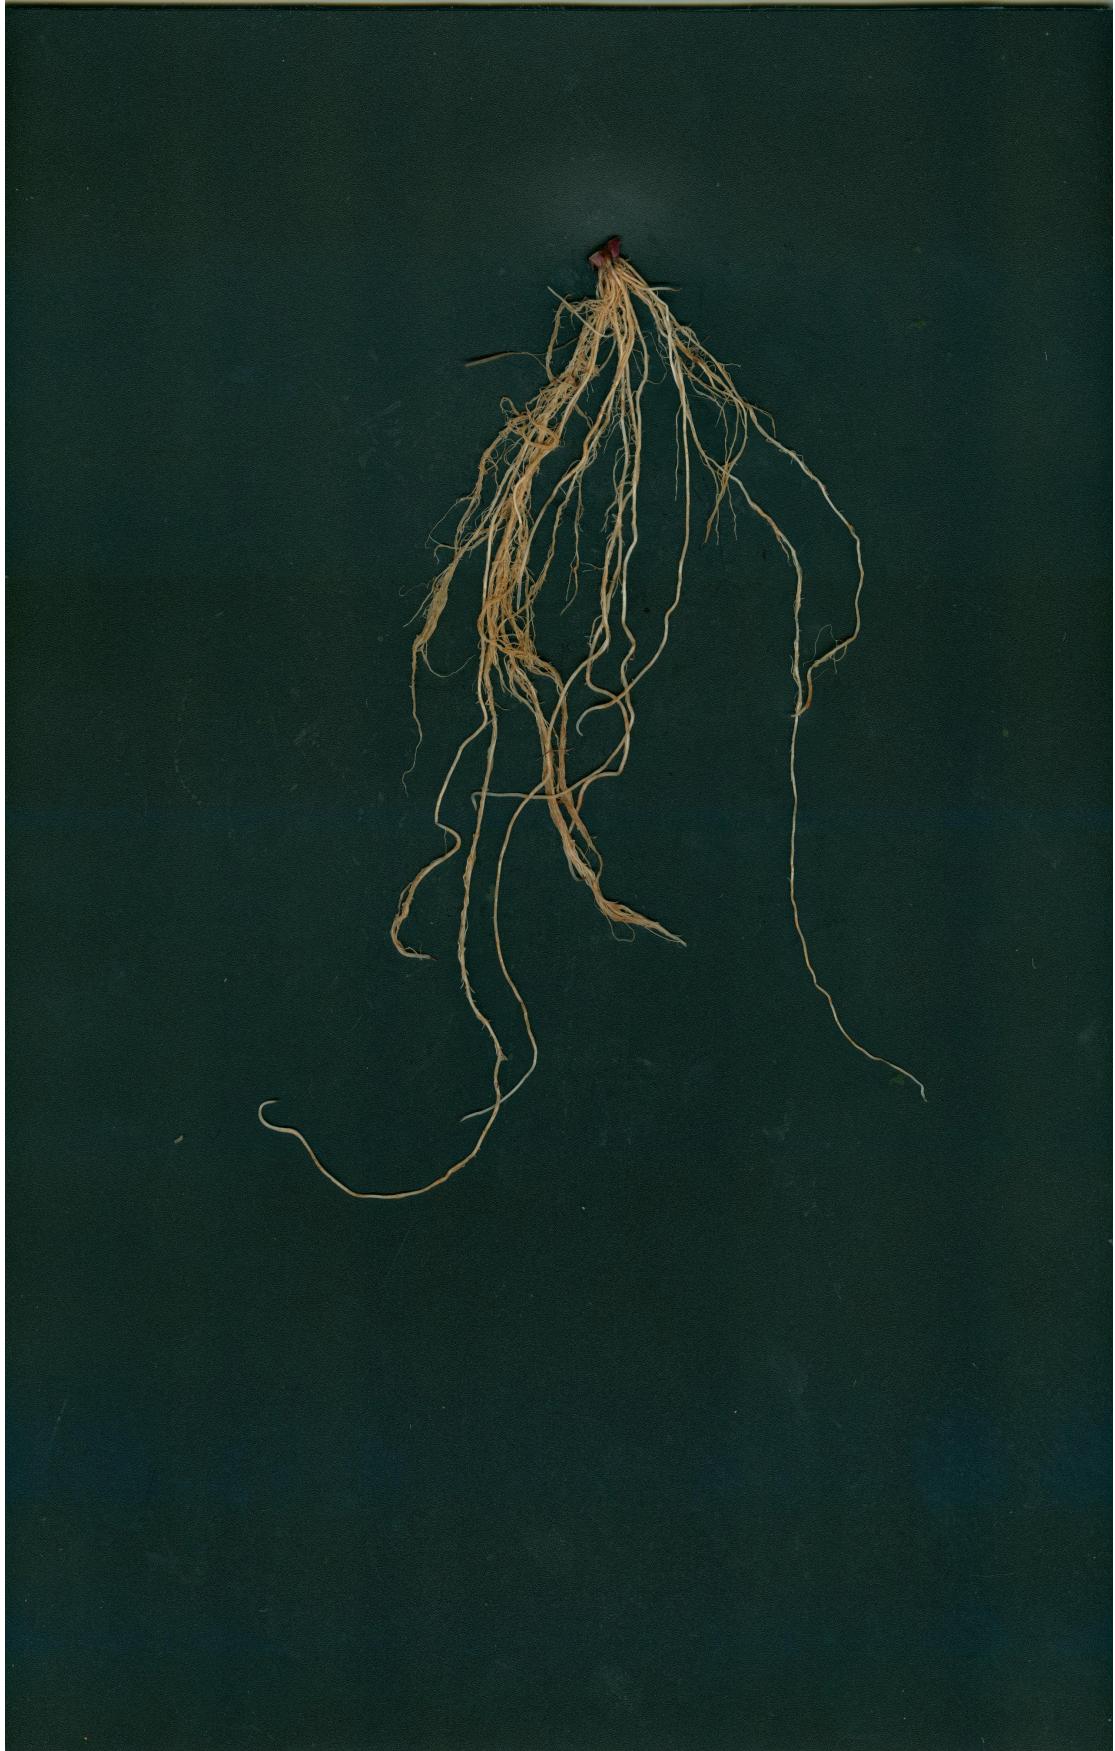

IAA+1000mg/kg Pb



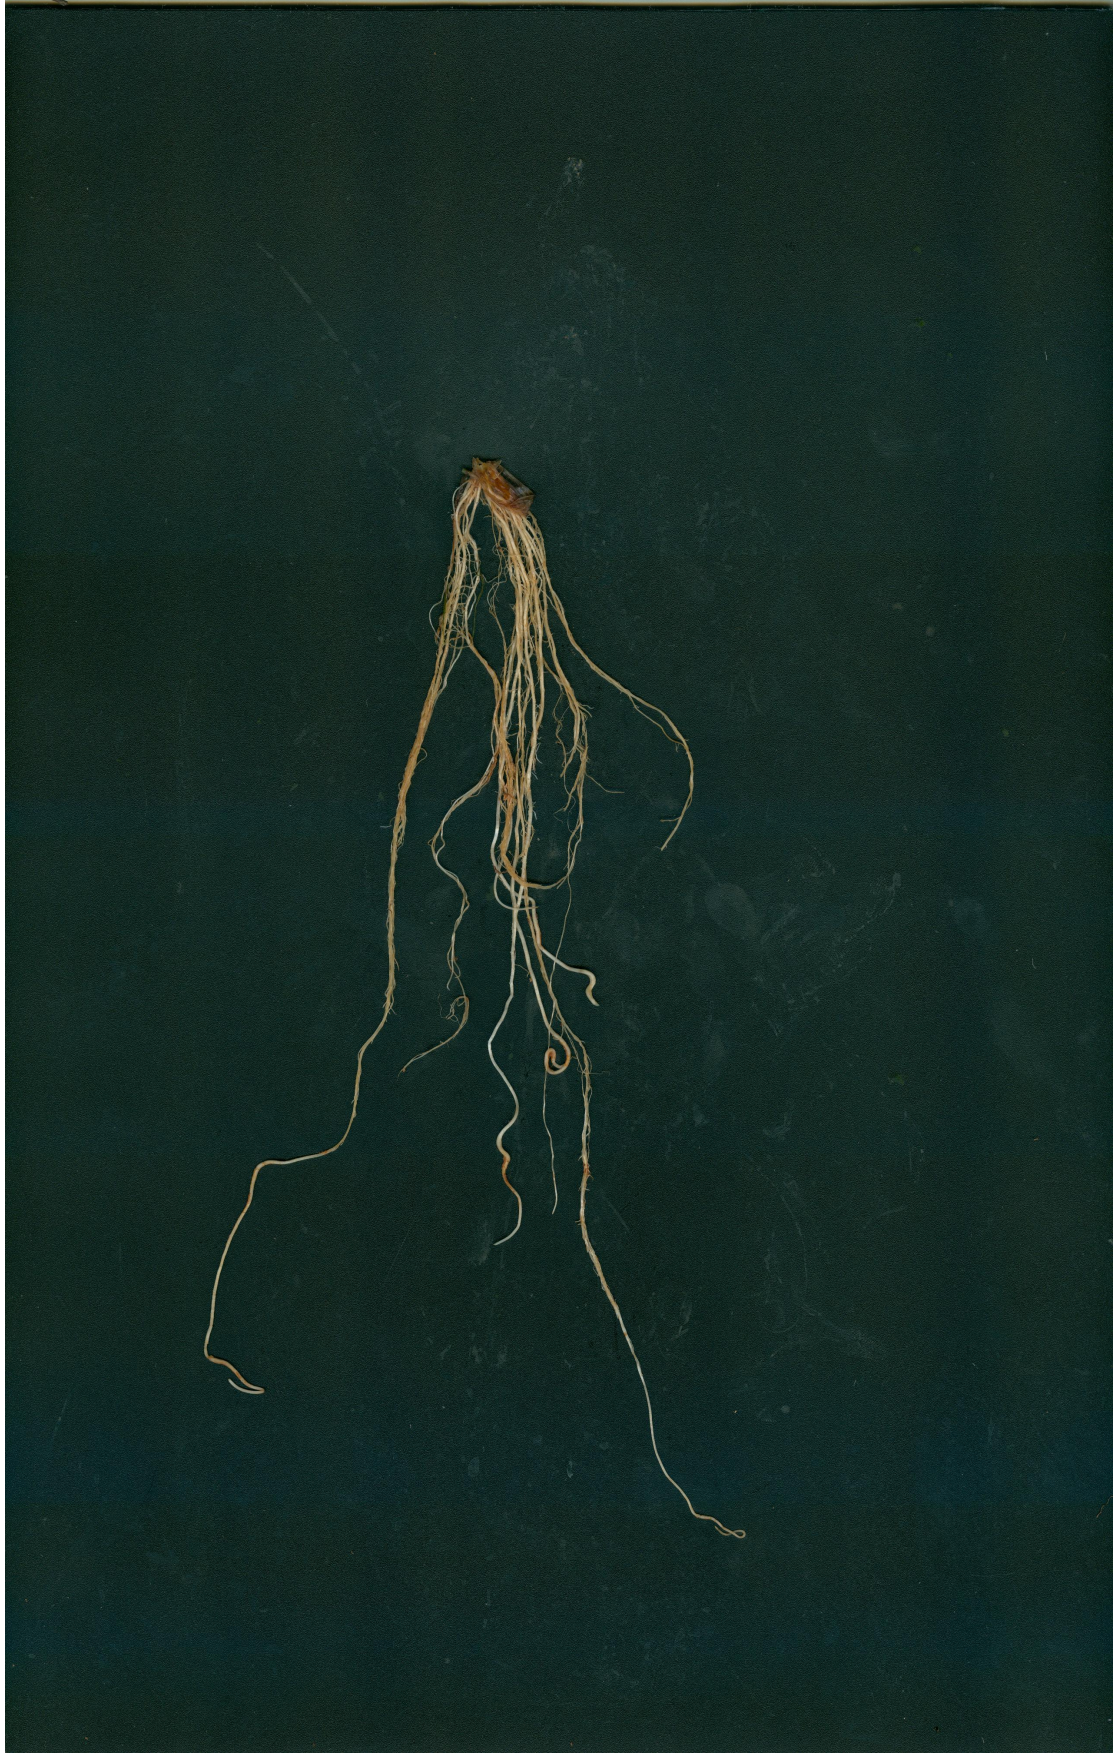

250mg/kg Pb



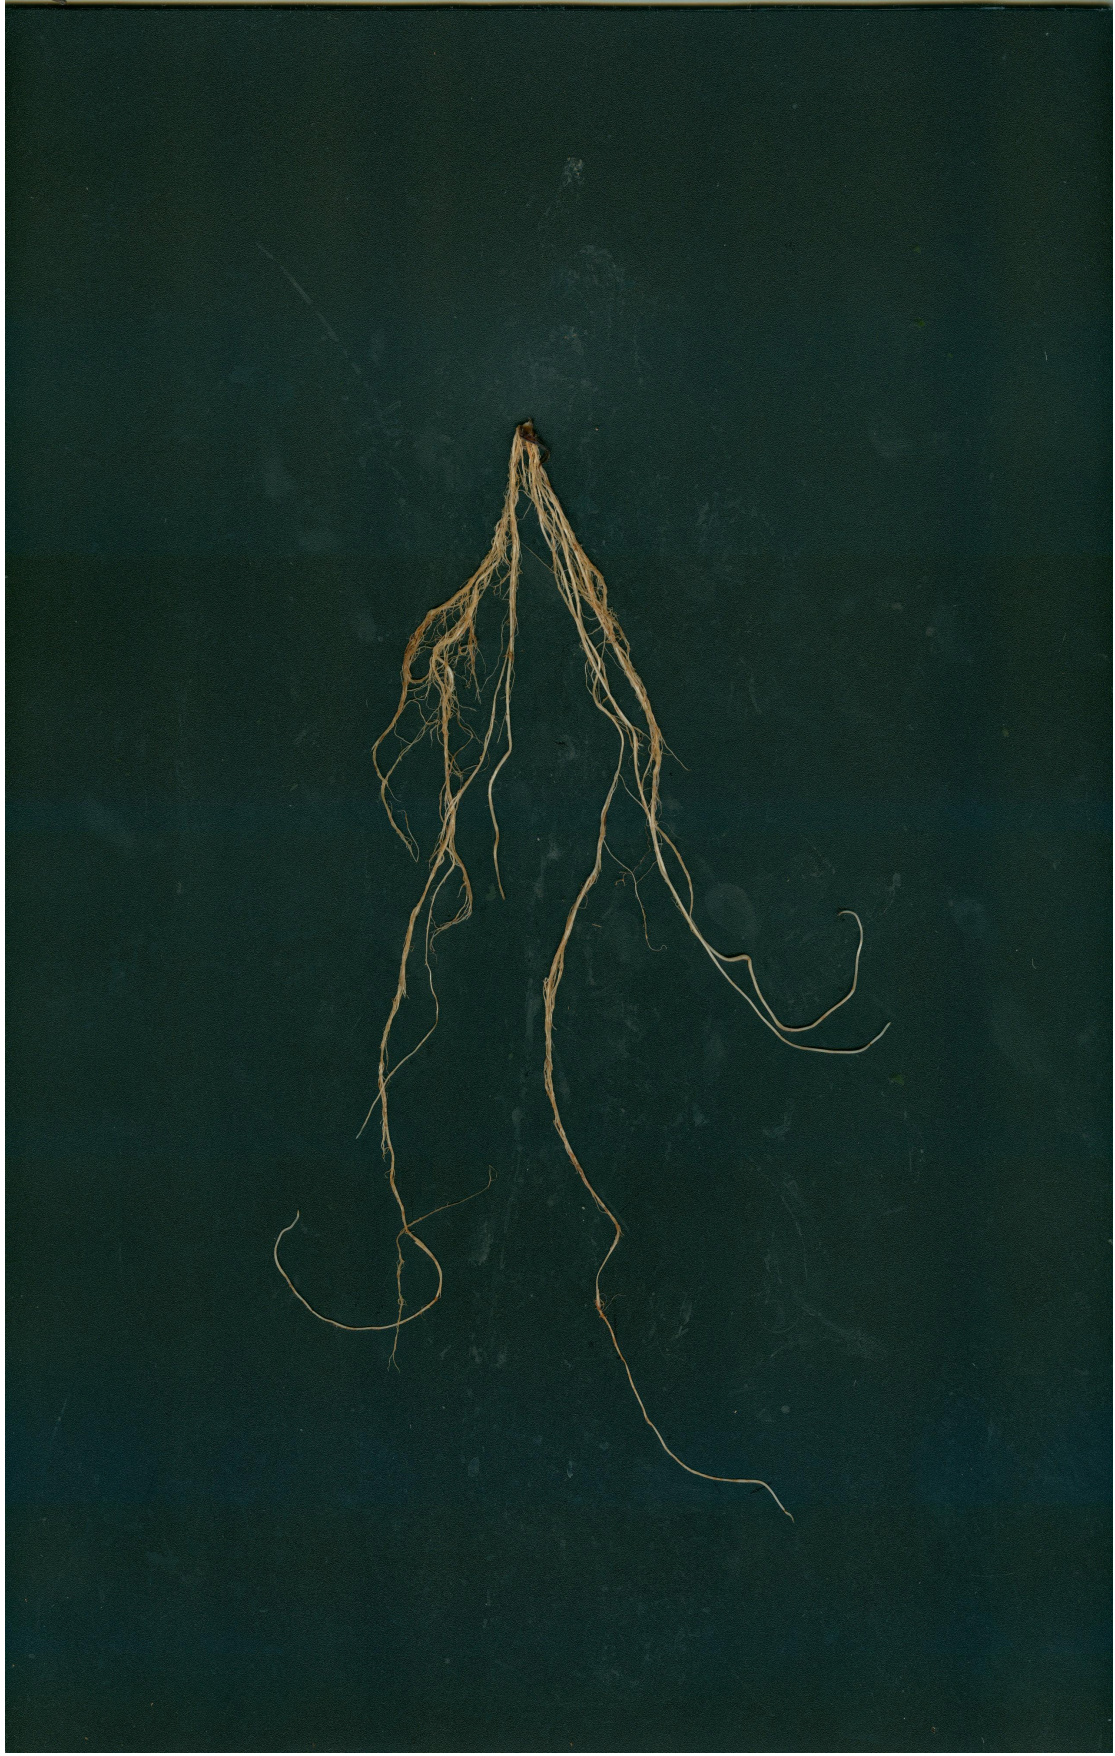

1000mg/kg Pb
